# Supplementary figures and images for: A one-step facile process for extraction of cellulose from rice husk and its use for mechanical reinforcement of dental glass ionomer cement
Source: Royal Society of Chemistry journal article supplement (doi:10.1039/d3su00230f), 2023-01-01

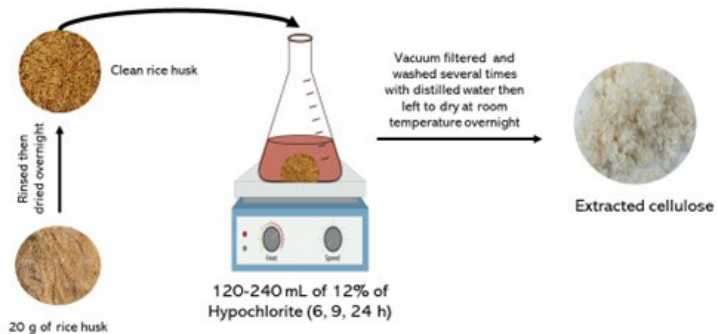

Supplement: d3su00230f2.pdf [file d3su00230f2.pdf]

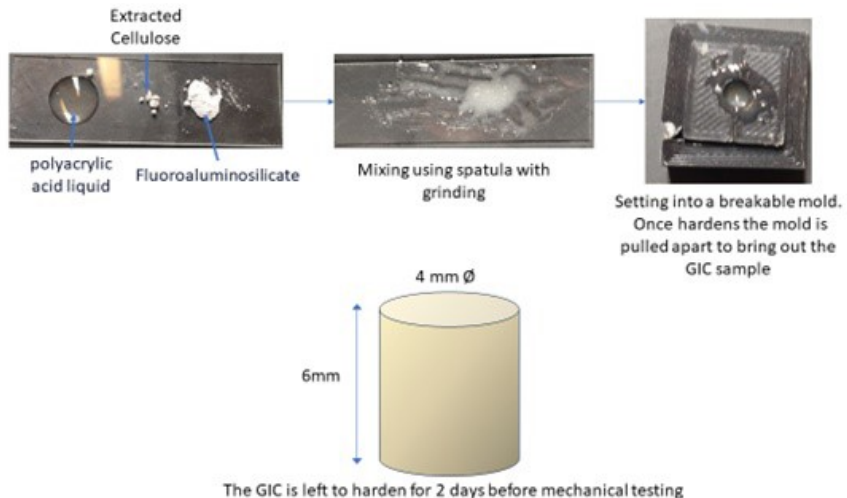

Supplement: d3su00230f3.pdf [file d3su00230f3.pdf]

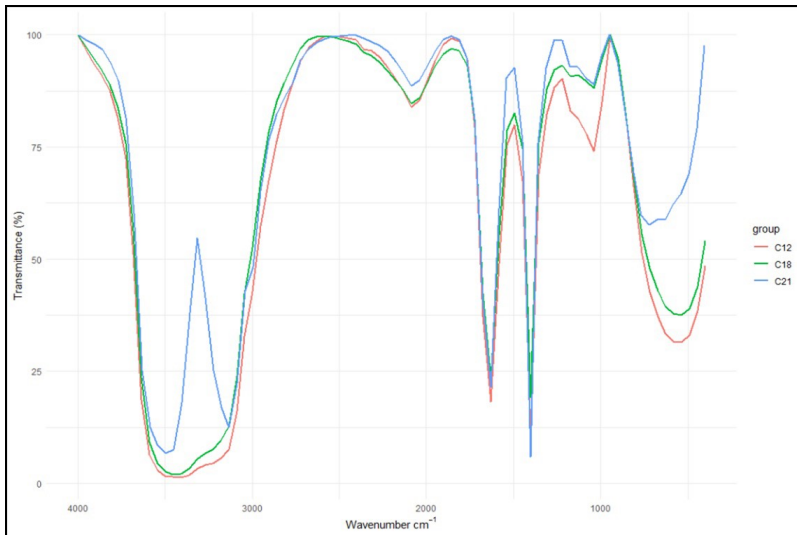

Supplement: d3su00230f4.pdf [file d3su00230f4.pdf]

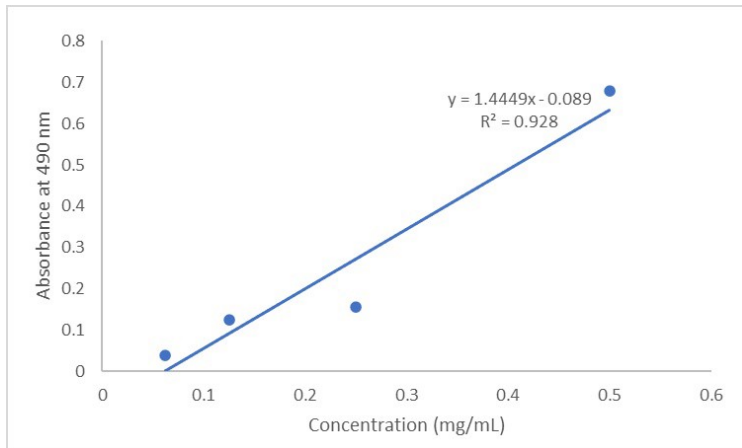

Supplement: d3su00230f5.pdf [file d3su00230f5.pdf]

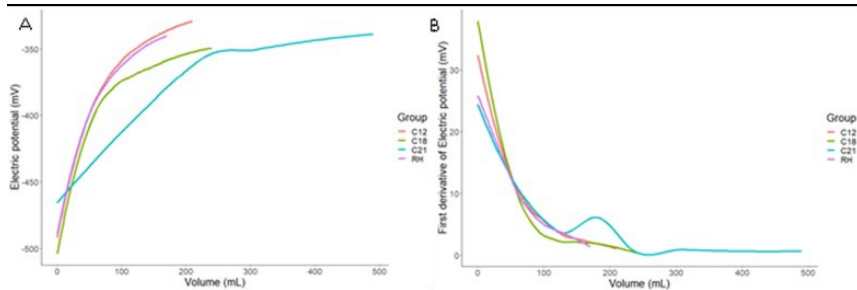

Supplement: d3su00230f6.pdf [file d3su00230f6.pdf]
